# Supplementary material
Source: PubMed Central journal article supplement (PMC7610510)
Supplement: EMS118466-supplement-Supplementary_Table_2.pdf [file EMS118466-supplement-Supplementary_Table_2.pdf]

**Supplementary Table 2. Summary of monosynaptic rabies tracing data.**

| Cortex (Bregma +2.2 → -0.3 mm)                       |     |               |     | Pons (-4.7 → -5.7 mm)              |     |               |     |
|------------------------------------------------------|-----|---------------|-----|------------------------------------|-----|---------------|-----|
| Ipsilateral                                          |     | Contralateral |     | Ipsilateral                        |     | Contralateral |     |
| M1                                                   | +++ | M1            | +++ | PnC                                | ++  | PnC           | +   |
| S1HL/FL                                              | +++ | S1HL/FL       | +++ | Irt                                | ++  | Irt           | ++  |
| S1DZ-J                                               | ++  | S1DZ-J        | ++  | PCRtA                              | +   | PCRtA         | +   |
| M2                                                   | +   | M2            | +   | MveMC                              | +   | MveMC         | +   |
| Fr3                                                  | +   | Fr3           | +   | SubCD                              | +   | SubCD         | +   |
| <b>Amygdala (-0.2 → -1.8 mm)</b>                     |     |               |     | PnO                                |     |               |     |
| Ipsilateral                                          |     | Contralateral |     | Ipsilateral                        |     | Contralateral |     |
| CeL/C/M                                              | ++  |               |     | mRt                                | +++ | mRt           | +   |
| BLA                                                  | +   |               |     | PrCnF                              | ++  | PrCnF         | +   |
| EAC                                                  | +   | EAC           | +   |                                    |     | 5N            | +   |
| AA                                                   | +   |               |     | <b>Cerebellum (-5.7 → -6.8 mm)</b> |     |               |     |
| <b>Zona Incerta (-1.8 → -2.8 mm)</b>                 |     |               |     | Ipsilateral                        |     |               |     |
| Ipsilateral                                          |     | Contralateral |     | Ipsilateral                        |     | Contralateral |     |
| ZID                                                  | +++ | ZID           | +   | Med                                | +   | Med           | +++ |
| ZIV                                                  | +   |               |     | Lat                                | +++ | Lat           | +++ |
| <b>Midbrain/Superior Colliculus (-3.1 → -4.2 mm)</b> |     |               |     | <b>Medulla (-5.7 → -7.8 mm)</b>    |     |               |     |
| Ipsilateral                                          |     | Contralateral |     | Ipsilateral                        |     | Contralateral |     |
| InG                                                  | +   | InG           | +++ | MdV                                | +   | MdV           | ++  |
| InW                                                  | ++  | InW           | +++ | Irt                                | ++  | Irt           | +++ |
|                                                      |     | DpW           | ++  | MdD                                | +   | MdD           | +   |
| mRt                                                  | ++  | mRt           | +   | LRt                                | +   | LRt           | ++  |
| PrCnF                                                | +   |               |     | *Gi                                | +++ | Gi            | +   |
|                                                      |     | RMC           | +   | PCRt/A                             | ++  | PCRt/A        | +   |
|                                                      |     |               |     | LPGi                               | +   | LPGi          | +   |
|                                                      |     |               |     |                                    |     | DPGi          | ++  |
|                                                      |     |               |     |                                    |     | GiA           | +   |

\*site of primary infection

+ denotes presence of rabies mCherry<sup>+</sup> neurons

++ small/intermediate number of mCherry<sup>+</sup> neurons

+++ significant population of mCherry<sup>+</sup> neurons

See also, Fig. 7 and Extended Data Fig. 7. Qualitative analysis is based on curation of rabies retrograde tracing data from  $n = 6$  mice (one experiment). Coordinates represent the rostrocaudal extent to which mCherry<sup>+</sup> neurons were observed in each corresponding structure (e.g. Cortex, Amygdala, etc.). Coordinates and abbreviations are based on Paxinos and Franklin's reference atlas<sup>55</sup>.

Abbreviations: 5N, motor trigeminal nucleus; AA, anterior amygdaloid area; BLA, basolateral amygdaloid nucleus, anterior part; CeC/L/M, central amygdaloid nucleus, capsular/lateral//medial

division; DPGi, dorsal paragigantocellular nucleus; DpW, deep white layer of the superior colliculus; EAC, extended amygdala, central part; Fr3, frontal cortex, area 3; Gi/A, gigantocellular reticular nucleus, alpha part; InG/W, intermediate grey/white layer of the superior colliculus; IRt, intermediate reticular nucleus; Lat, lateral cerebellar nucleus; LPGi, lateral paragigantocellular nucleus; LRt, lateral reticular nucleus; M1, primary motor cortex; M2, secondary motor cortex; MdD/V, medullary reticular nucleus, dorsal/ventral part; Med, medial cerebellar nucleus; mRt, mesencephalic reticular formation; MVeMC, medial vestibular nucleus, magnocellular part; PCRt/A, parvicellular reticular nucleus, alpha part; PnC/O, pontine reticular nucleus, caudal/oral part; PrCnF, precuneform area; RMC, red nucleus, magnocellular part; S1 DZ/J/HL/FL, primary somatosensory cortex, dysgranular zone/jaw region/hindlimb region/forelimb region, SubCD, subcoeruleus nucleus, dorsal part; ZID/V, zona incerta, dorsal/ventral part.
